# Supplementary material
Source: Springer Nature journal article supplement (https://www.springermedizin.de/resource/supplementary/13048_2014_240_MOESM3_ESM.pdf/9665188)
Supplement: MOESM3 [file 9665188]

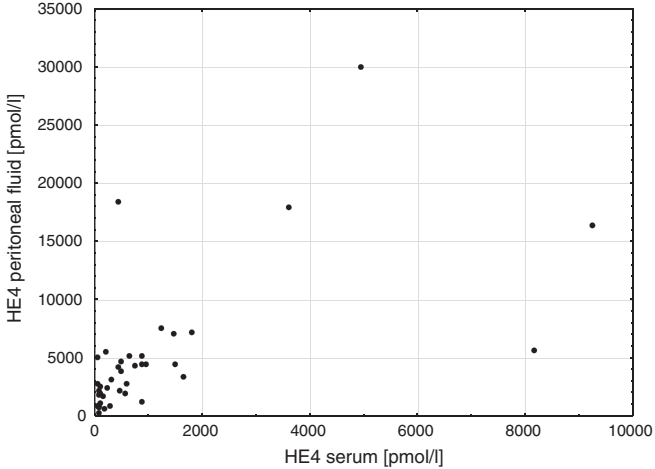

Group I ;  $r_s = -0.6909$ ,  $p = 0.000001$

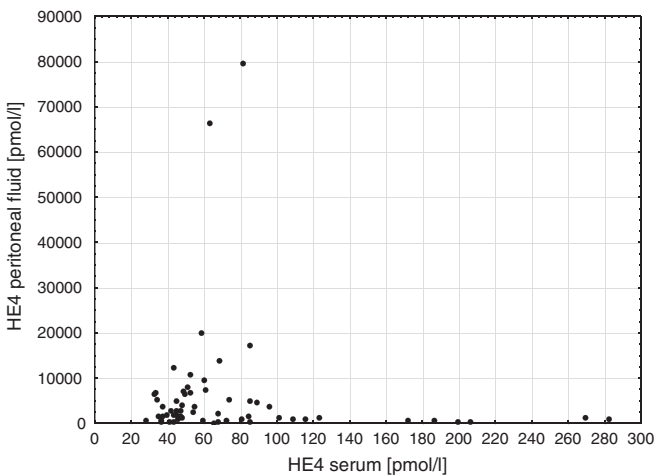

Group II ; statistically insignificant

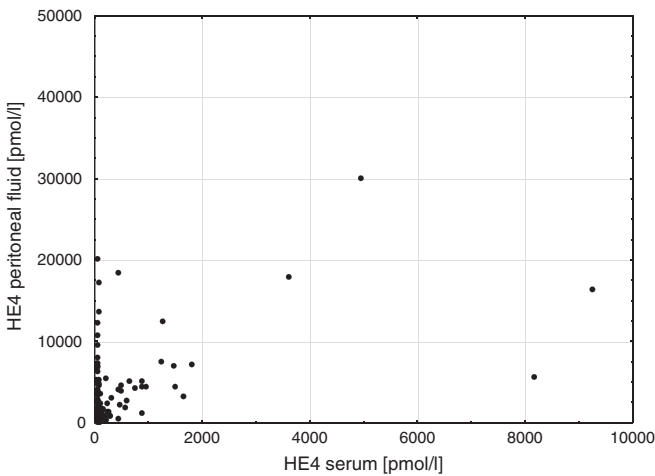

All the patients ( groups I+II+III ) ; statistically insignificant
